# Supplementary material for: TEMPO-Nanocellulose/Ca2+ Hydrogels: Ibuprofen Drug Diffusion and In Vitro Cytocompatibility
Source: PubMed Central journal article supplement (PMC6981511; doi:10.3390/ma13010183), 2020-01-02
Supplement: materials-13-00183-s001.pdf [file materials-13-00183-s001.pdf]

Supplementary Materials

# Ibuprofen Diffusion and L929 Cells' Encapsulation in TEMPO-Nanocellulose Hydrogels

Andrea Fiorati <sup>1,2,\*</sup>, Nicola Contessi Negrini <sup>1,2</sup>, Elena Baschenis <sup>1</sup>, Lina Altomare <sup>1,2</sup>, Silvia Faré <sup>1,2</sup>, Alberto Giacometti Schieroni <sup>3</sup>, Daniele Piovani <sup>3</sup>, Raniero Mendichi <sup>3</sup>, Monica Ferro <sup>1</sup>, Franca Castiglione <sup>1</sup>, Andrea Mele <sup>1,3</sup>, Carlo Punta <sup>1,2</sup> and Lucio Melone <sup>1,2,\*</sup>

<sup>1</sup> Department of Chemistry, Materials, and Chemical Engineering "G. Natta" – Politecnico di Milano, Piazza Leonardo da Vinci 32, Milano I-20133, Italy; nicola.contessi@polimi.it (N.C.N.); baschenis.e@gmail.com (E.B.); lina.altomare@polimi.it (L.A.); silvia.fare@polimi.it (S.F.); monica.ferro@polimi.it (M.F.); franca.castiglione@polimi.it (F.C.); andrea.mele@polimi.it (A.M.); carlo.punta@polimi.it (C.P.)

<sup>2</sup> INSTM, National Consortium of Materials Science and Technology, Local Unit Politecnico di Milano, Milano 20133, Italy

<sup>3</sup> Istituto di Scienze e Tecnologie Chimiche (SCITEC-CNR), Via A. Corti 12, Milano 20133, Italy; giacometti@ismac.cnr.it (A.G.S.); piovani@ismac.cnr.it (D.P.); rmendichi@libero.it (R.M.)

\* Correspondence: andrea.fiorati@polimi.it (A.F.); lucio.melone@polimi.it (L.M.)

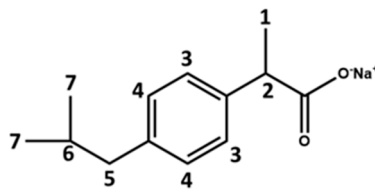

Figure S1. Ibuprofen chemical structure.

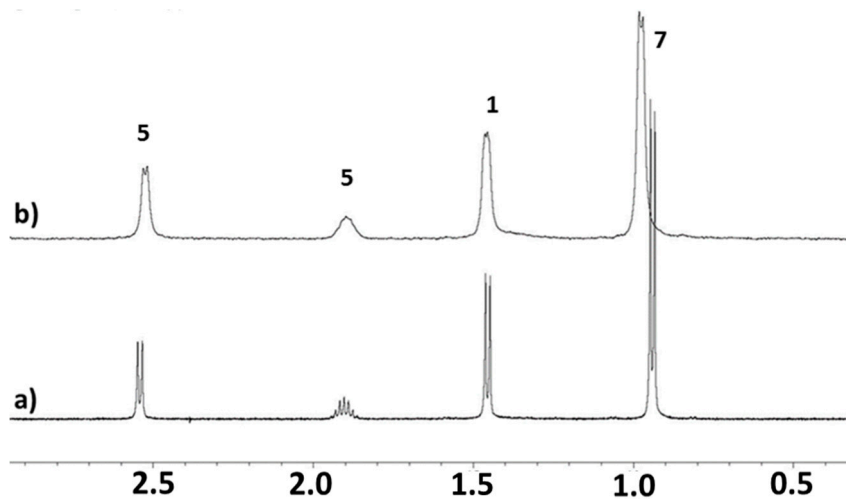

Figure S2. Zoom of <sup>1</sup>H high-resolution magic angle spinning nuclear magnetic resonance (HR-MAS) spectra of: (a) ibuprofen (IB); (b) IB/β-cyclodextrin (β-CD) (1:1) complex loaded in C1 hydrogel.

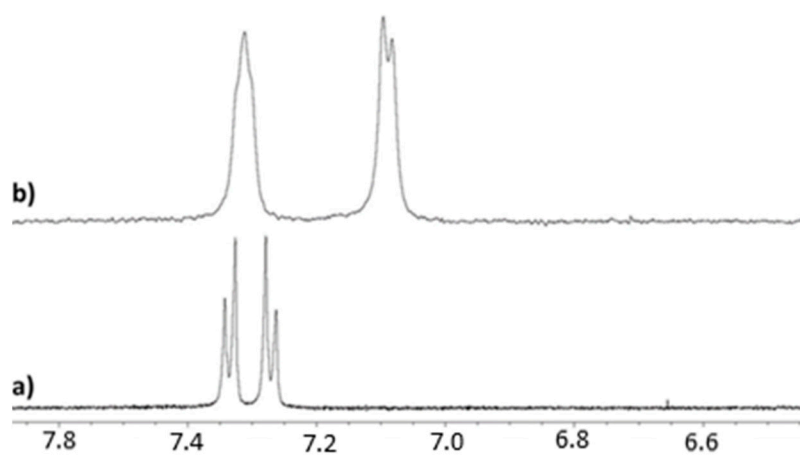

**Figure S3.** Zoom of <sup>1</sup>H HR-MAS spectra of: (a) IB; (b) IB/ $\beta$ -CD (1:1) complex loaded in C1 hydrogel.

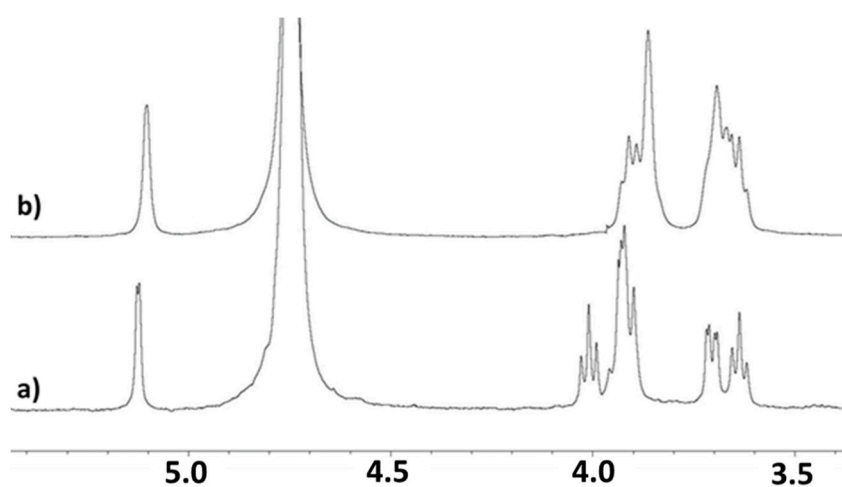

**Figure S4.** Zoom of <sup>1</sup>H HR-MAS spectra of: (a)  $\beta$ -CD; (b) IB/ $\beta$ -CD (1:1) complex loaded in C1 hydrogel.

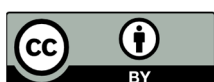

© 2020 by the authors. Submitted for possible open access publication under the terms and conditions of the Creative Commons Attribution (CC BY) license (<http://creativecommons.org/licenses/by/4.0/>).
